# Supplementary material
Source: PubMed Central journal article supplement (PMC6715834)
Supplement: AEM.01220-19-s0001.pdf [file AEM.01220-19-s0001.pdf]

## Molecular epidemiology of *Xanthomonas perforans* outbreaks in tomato from transplant to field by single-nucleotide polymorphism analysis

Peter Abrahamian, Sujan Timilsina, Gerald V. Minsavage, Neha Potnis, Jeffrey B. Jones, Erica M. Goss, Gary E. Vallad

### Supplementary information

**Table S1.** Genome details of sequenced strains collected from grower A.

| <b>Strain</b> | <b>Size (bp)</b> | <b>Coverage</b> | <b>Genes</b> | <b>GC%</b> | <b>Contigs</b> |
|---------------|------------------|-----------------|--------------|------------|----------------|
| GEV1989       | 5,201,369        | 38.4            | 4,632        | 64.70      | 247            |
| GEV1991       | 5,192,752        | 33.9            | 4,611        | 64.70      | 238            |
| GEV1992       | 5,191,666        | 38.1            | 4,642        | 64.70      | 262            |
| GEV1993       | 5,155,078        | 33.7            | 4,622        | 64.69      | 279            |
| GEV2004       | 5,057,458        | 18.9            | 4,646        | 64.66      | 425            |
| GEV2009       | 5,136,944        | 43.9            | 4,620        | 64.71      | 324            |
| GEV2010       | 5,174,097        | 29.3            | 4,585        | 64.67      | 264            |
| GEV2011       | 5,115,304        | 34.2            | 4,542        | 64.71      | 261            |
| GEV2013       | 5,135,549        | 28.6            | 4,561        | 64.68      | 345            |
| GEV2015       | 5,144,994        | 35.4            | 4,576        | 64.70      | 250            |
| GEV2047       | 5,185,550        | 26.7            | 4,677        | 64.69      | 304            |
| GEV2048       | 5,177,283        | 47.4            | 4,655        | 64.69      | 304            |
| GEV2049       | 5,167,720        | 40.9            | 4,660        | 64.70      | 302            |
| GEV2050       | 5,165,201        | 41.5            | 4,639        | 64.70      | 281            |
| GEV2052       | 5,190,899        | 36.7            | 4,619        | 64.69      | 249            |
| GEV2055       | 5,177,880        | 39.1            | 4,696        | 64.70      | 368            |
| GEV2058       | 5,210,673        | 56.9            | 4,633        | 64.71      | 233            |
| GEV2059       | 5,179,416        | 45.9            | 4,686        | 64.69      | 331            |
| GEV2060       | 5,183,330        | 45.6            | 4,699        | 64.71      | 359            |
| GEV2063       | 5,128,950        | 31.1            | 4,608        | 64.70      | 279            |

**Table S2.** Genome details of sequenced strains collected from grower B.

| <b>Strain</b> | <b>Size (bp)</b> | <b>Coverage</b> | <b>Genes</b> | <b>GC%</b> | <b>Contigs</b> |
|---------------|------------------|-----------------|--------------|------------|----------------|
| GEV1911       | 5,137,800        | 21.7            | 4,681        | 64.67      | 404            |
| GEV1912       | 5,167,005        | 30.4            | 4,598        | 64.70      | 253            |
| GEV1913       | 5,183,227        | 25.5            | 4,678        | 64.68      | 340            |
| GEV1914       | 5,113,830        | 25.9            | 4,671        | 64.61      | 409            |
| GEV1915       | 5,174,692        | 25.2            | 4,695        | 64.61      | 361            |
| GEV1916       | 5,102,395        | 30.3            | 4,591        | 64.67      | 311            |
| GEV1917       | 5,161,255        | 30.8            | 4,601        | 64.67      | 267            |
| GEV1918       | 5,092,768        | 29.7            | 4,548        | 64.69      | 255            |
| GEV1919       | 5,186,082        | 46.1            | 4,658        | 64.68      | 286            |
| GEV1920       | 5,147,727        | 25.4            | 4,647        | 64.61      | 330            |
| GEV1921       | 5,172,196        | 29.4            | 4,663        | 64.71      | 333            |
| GEV2065       | 5,129,485        | 31.3            | 4,603        | 64.64      | 328            |
| GEV2067       | 5,213,895        | 32.7            | 4,635        | 64.64      | 248            |
| GEV2072       | 5,203,120        | 34.3            | 4,622        | 64.68      | 240            |
| GEV2087       | 5,122,760        | 34.6            | 4,582        | 64.67      | 272            |
| GEV2088       | 5,139,743        | 28.9            | 4,643        | 64.69      | 315            |
| GEV2089       | 5,102,991        | 28.1            | 4,623        | 64.67      | 328            |
| GEV2097       | 5,129,171        | 32.2            | 4,560        | 64.68      | 299            |
| GEV2098       | 5,174,608        | 29.6            | 4,661        | 64.70      | 323            |
| GEV2099       | 5,110,801        | 31.0            | 4,550        | 64.71      | 303            |
| GEV2108       | 5,105,539        | 37.8            | 4,566        | 64.71      | 345            |
| GEV2109       | 5,200,764        | 40.2            | 4,661        | 64.67      | 277            |
| GEV2110       | 5,120,298        | 42.9            | 4,567        | 64.77      | 237            |
| GEV2111       | 5,100,511        | 52.1            | 4,481        | 64.81      | 181            |
| GEV2112       | 5,089,796        | 27.6            | 4,530        | 64.64      | 301            |
| GEV2113       | 5,163,947        | 25.2            | 4,671        | 64.62      | 345            |
| GEV2114       | 5,172,135        | 28.9            | 4,648        | 64.61      | 314            |
| GEV2115       | 5,179,887        | 29.6            | 4,692        | 64.66      | 377            |
| GEV2116       | 5,153,501        | 25.6            | 4,620        | 64.67      | 299            |
| GEV2117       | 5,070,119        | 26.8            | 4,539        | 64.80      | 272            |
| GEV2118       | 5,161,403        | 26.2            | 4,654        | 64.68      | 314            |
| GEV2119       | 5,114,562        | 23.9            | 4,580        | 64.66      | 294            |
| GEV2120       | 5,196,625        | 25.9            | 4,647        | 64.62      | 276            |
| GEV2121       | 5,079,594        | 21.7            | 4,532        | 64.64      | 286            |
| GEV2122       | 5,127,626        | 22.0            | 4,544        | 64.64      | 235            |
| GEV2123       | 5,002,536        | 19.8            | 4,592        | 64.63      | 420            |
| GEV2124       | 5,031,454        | 25.9            | 4,426        | 64.71      | 221            |
| GEV2125       | 4,944,651        | 14.0            | 4,591        | 64.66      | 525            |
| GEV2126       | 5,089,637        | 30.0            | 4,475        | 64.79      | 204            |

| <b>Strain</b> | <b>Size (bp)</b> | <b>Coverage</b> | <b>Genes</b> | <b>GC%</b> | <b>Contigs</b> |
|---------------|------------------|-----------------|--------------|------------|----------------|
| GEV2127       | 5,031,736        | 22.3            | 4,490        | 64.69      | 296            |
| GEV2128       | 5,129,344        | 33.2            | 4,517        | 64.69      | 247            |
| GEV2129       | 5,145,947        | 24.7            | 4,585        | 64.66      | 256            |
| GEV2130       | 5,120,789        | 33.1            | 4,480        | 64.71      | 195            |
| GEV2132       | 5,059,184        | 33.2            | 4,452        | 64.80      | 193            |
| GEV2133       | 5,149,660        | 32.4            | 4,551        | 64.71      | 185            |
| GEV2134       | 5,106,930        | 27.6            | 4,513        | 64.67      | 221            |
| GEV2135       | 5,092,715        | 28.1            | 4,474        | 64.81      | 175            |
| GEV2384       | 5,222,248        | 12.6            | 4,647        | 64.69      | 213            |
| GEV2388       | 5,236,092        | 14.1            | 4,639        | 64.70      | 167            |
| GEV2389       | 5,215,458        | 16.0            | 4,554        | 64.69      | 132            |
| GEV2390       | 5,228,216        | 18.8            | 4,522        | 64.67      | 98             |
| GEV2391       | 5,179,570        | 14.7            | 4,532        | 64.72      | 154            |
| GEV2392       | 5,219,799        | 13.3            | 4,569        | 64.66      | 155            |
| GEV2393       | 5,214,977        | 13.1            | 4,619        | 64.69      | 190            |
| GEV2396       | 5,221,146        | 13.6            | 4,562        | 64.66      | 157            |
| GEV2397       | 5,210,116        | 12.0            | 4,622        | 64.66      | 238            |
| GEV2398       | 4,681,733        | 7.7             | 4,604        | 64.56      | 743            |
| GEV2399       | 5,188,814        | 13.8            | 4,586        | 64.75      | 168            |
| GEV2400       | 5,197,734        | 12.5            | 4,609        | 64.68      | 226            |
| GEV2403       | 5,207,841        | 13.6            | 4,606        | 64.69      | 182            |
| GEV2407       | 5,234,490        | 15.0            | 4,586        | 64.70      | 134            |
| GEV2408       | 5,108,905        | 12.6            | 4,496        | 64.80      | 193            |
| GEV2410       | 5,234,631        | 16.5            | 4,588        | 64.69      | 136            |
| GEV2420       | 5,239,724        | 13.7            | 4,636        | 64.67      | 181            |

**Table S3.** Single nucleotide polymorphism (SNP) details for individually sequenced strains in this study compared to reference strain Xp91-118.

| Strain         | #SNP <sup>a</sup> | CDS <sup>b</sup> | Intergenic | Non-synonymous <sup>c</sup> | Synonymous | Nonsense |
|----------------|-------------------|------------------|------------|-----------------------------|------------|----------|
| <b>Group 1</b> |                   |                  |            |                             |            |          |
| GEV872         | 1,348             | 1,127            | 221        | 300                         | 825        | 2        |
| GEV893         | 1,339             | 1,119            | 220        | 293                         | 824        | 2        |
| GEV904         | 1,337             | 1,119            | 218        | 291                         | 826        | 2        |
| GEV909         | 1,344             | 1,125            | 219        | 299                         | 824        | 2        |
| GEV915         | 1,349             | 1,127            | 222        | 296                         | 829        | 2        |
| GEV917         | 1,335             | 1,118            | 217        | 295                         | 821        | 2        |
| GEV936         | 1,342             | 1,123            | 219        | 296                         | 825        | 2        |
| GEV940         | 1,352             | 1,134            | 218        | 303                         | 828        | 3        |
| GEV968         | 1,346             | 1,125            | 221        | 296                         | 827        | 2        |
| GEV993         | 1,348             | 1,128            | 220        | 298                         | 828        | 2        |
| GEV1026        | 1,350             | 1,129            | 221        | 300                         | 827        | 2        |
| GEV2398        | 1,069             | 902              | 164        | 209                         | 694        | 1        |
| <b>Group 2</b> |                   |                  |            |                             |            |          |
| Xp2010         | 4,133             | 3,406            | 722        | 874                         | 2,527      | 8        |
| GEV839         | 4,249             | 3,517            | 727        | 888                         | 2,624      | 8        |
| GEV1001        | 4,118             | 3,399            | 714        | 860                         | 2,535      | 7        |
| GEV1044        | 4,136             | 3,411            | 720        | 866                         | 2,540      | 8        |
| GEV1054        | 4,140             | 3,412            | 723        | 866                         | 2,542      | 7        |
| GEV1063        | 4,115             | 3,388            | 722        | 862                         | 2,522      | 7        |
| GEV1911        | 3,982             | 3,291            | 686        | 841                         | 2,446      | 7        |
| GEV1912        | 4,093             | 3,386            | 702        | 863                         | 2,519      | 7        |
| GEV1913        | 4,060             | 3,359            | 696        | 853                         | 2,502      | 7        |
| GEV1914        | 3,972             | 3,274            | 693        | 840                         | 2,430      | 7        |
| GEV1915        | 4,044             | 3,338            | 701        | 848                         | 2,486      | 7        |
| GEV1916        | 4,098             | 3,387            | 706        | 868                         | 2,515      | 7        |
| GEV1917        | 4,088             | 3,381            | 702        | 861                         | 2,516      | 7        |
| GEV1918        | 4,077             | 3,371            | 701        | 864                         | 2,503      | 7        |
| GEV1919        | 4,117             | 3,398            | 714        | 871                         | 2,522      | 8        |
| GEV1920        | 4,003             | 3,304            | 695        | 841                         | 2,458      | 8        |
| GEV1921        | 4,087             | 3,381            | 701        | 860                         | 2,516      | 8        |
| GEV1989        | 4,135             | 3,428            | 702        | 871                         | 2,550      | 7        |
| GEV1991        | 4,120             | 3,415            | 702        | 870                         | 2,540      | 8        |
| GEV1992        | 4,142             | 3,423            | 714        | 870                         | 2,549      | 7        |
| GEV1993        | 4,108             | 3,400            | 703        | 860                         | 2,535      | 8        |
| GEV2004        | 3,669             | 3,024            | 641        | 759                         | 2,260      | 7        |
| GEV2009        | 4,130             | 3,410            | 715        | 878                         | 2,528      | 7        |
| GEV2011        | 4,090             | 3,379            | 706        | 862                         | 2,513      | 7        |
| GEV2013        | 4,062             | 3,357            | 700        | 852                         | 2,501      | 7        |
| GEV2015        | 4,126             | 3,416            | 705        | 872                         | 2,539      | 8        |
| GEV2047        | 4,052             | 3,345            | 702        | 846                         | 2,495      | 7        |
| GEV2048        | 4,148             | 3,433            | 711        | 873                         | 2,554      | 8        |
| GEV2049        | 4,132             | 3,417            | 710        | 871                         | 2,542      | 7        |
| GEV2050        | 4,124             | 3,412            | 707        | 869                         | 2,539      | 7        |
| GEV2052        | 4,133             | 3,417            | 711        | 869                         | 2,544      | 7        |
| GEV2055        | 4,122             | 3,406            | 710        | 870                         | 2,532      | 7        |
| GEV2056        | 4,164             | 3,435            | 723        | 878                         | 2,522      | 8        |
| GEV2059        | 4,135             | 3,419            | 711        | 871                         | 2,544      | 7        |
| GEV2060        | 4,144             | 3,419            | 719        | 870                         | 2,544      | 8        |
| GEV2063        | 4,120             | 3,415            | 699        | 868                         | 2,542      | 8        |

| Strain         | #SNP <sup>a</sup> | CDS <sup>b</sup> | Intergenic | Non-synonymous <sup>c</sup> | Synonymous | Nonsense |
|----------------|-------------------|------------------|------------|-----------------------------|------------|----------|
| GEV2067        | 4,106             | 3,396            | 705        | 867                         | 2,525      | 7        |
| GEV2072        | 4,105             | 3,388            | 712        | 864                         | 2,520      | 7        |
| GEV2087        | 4,120             | 3,410            | 705        | 867                         | 2,539      | 7        |
| GEV2088        | 4,094             | 3,383            | 706        | 859                         | 2,520      | 7        |
| GEV2089        | 4,076             | 3,373            | 698        | 859                         | 2,510      | 7        |
| GEV2098        | 4,100             | 3,388            | 707        | 863                         | 2,521      | 7        |
| GEV2109        | 4,124             | 3,408            | 711        | 871                         | 2,532      | 8        |
| GEV2110        | 4,103             | 3,380            | 718        | 865                         | 2,511      | 7        |
| GEV2111        | 4,119             | 3,400            | 714        | 872                         | 2,523      | 8        |
| GEV2113        | 4,027             | 3,317            | 705        | 844                         | 2,468      | 8        |
| GEV2114        | 4,089             | 3,383            | 701        | 858                         | 2,520      | 8        |
| GEV2115        | 4,076             | 3,370            | 701        | 861                         | 2,505      | 7        |
| GEV2116        | 4,067             | 3,357            | 705        | 857                         | 2,495      | 8        |
| GEV2117        | 4,030             | 3,330            | 695        | 854                         | 2,472      | 7        |
| GEV2118        | 4,038             | 3,332            | 701        | 848                         | 2,480      | 7        |
| GEV2119        | 4,013             | 3,316            | 692        | 846                         | 2,465      | 8        |
| GEV2120        | 4,049             | 3,345            | 699        | 855                         | 2,486      | 7        |
| GEV2123        | 3,864             | 3,178            | 681        | 807                         | 2,367      | 7        |
| GEV2126        | 4,059             | 3,356            | 698        | 859                         | 2,492      | 8        |
| GEV2129        | 4,057             | 3,351            | 701        | 853                         | 2,494      | 7        |
| GEV2132        | 4,093             | 3,389            | 699        | 864                         | 2,520      | 8        |
| GEV2133        | 4,089             | 3,385            | 699        | 860                         | 2,521      | 7        |
| GEV2135        | 4,068             | 3,364            | 699        | 859                         | 2,501      | 7        |
| GEV2384        | 2,796             | 2,296            | 520        | 543                         | 1,723      | 6        |
| GEV2388        | 3,039             | 2,510            | 525        | 607                         | 1,900      | 6        |
| GEV2389        | 3,571             | 2,939            | 626        | 727                         | 2,208      | 7        |
| GEV2391        | 3,387             | 2,768            | 614        | 698                         | 2,066      | 7        |
| GEV2393        | 2,910             | 2,407            | 499        | 594                         | 1,810      | 6        |
| GEV2399        | 3,156             | 2,572            | 579        | 651                         | 1,917      | 6        |
| GEV2400        | 2,764             | 2,207            | 552        | 561                         | 1,643      | 5        |
| GEV2403        | 3,169             | 2,578            | 586        | 670                         | 1,905      | 6        |
| GEV2407        | 3,349             | 2,741            | 603        | 691                         | 2,045      | 8        |
| GEV2408        | 2,955             | 2,427            | 521        | 627                         | 1,796      | 7        |
| GEV2410        | 3,583             | 2,930            | 648        | 747                         | 2,179      | 7        |
| GEV2420        | 3,035             | 2,491            | 540        | 604                         | 1,883      | 6        |
| <b>Group 3</b> |                   |                  |            |                             |            |          |
| Xp17-12        | 5,128             | 4,076            | 1,043      | 1,020                       | 3,054      | 8        |
| GEV2010        | 4,660             | 3,903            | 748        | 955                         | 2,949      | 5        |
| GEV2065        | 4,680             | 3,910            | 761        | 949                         | 2,961      | 6        |
| GEV2097        | 4,677             | 3,915            | 753        | 942                         | 2,974      | 5        |
| GEV2099        | 4,629             | 3,874            | 746        | 931                         | 2,944      | 5        |
| GEV2108        | 4,645             | 3,887            | 749        | 943                         | 2,945      | 5        |
| GEV2112        | 4,624             | 3,861            | 754        | 938                         | 2,923      | 6        |
| GEV2121        | 4,515             | 3,778            | 728        | 924                         | 2,855      | 5        |
| GEV2122        | 4,527             | 3,779            | 738        | 915                         | 2,864      | 6        |
| GEV2124        | 4,578             | 3,834            | 736        | 922                         | 2,912      | 5        |
| GEV2125        | 3,592             | 3,016            | 567        | 726                         | 2,290      | 5        |
| GEV2127        | 4,492             | 3,752            | 729        | 897                         | 2,856      | 6        |
| GEV2128        | 4,675             | 3,911            | 755        | 947                         | 2,964      | 6        |
| GEV2130        | 4,649             | 3,892            | 748        | 942                         | 2,951      | 5        |
| GEV2134        | 4,652             | 3,887            | 756        | 938                         | 2,950      | 5        |
| GEV2390        | 4,210             | 3,539            | 666        | 870                         | 2,668      | 5        |
| GEV2392        | 3,247             | 2,701            | 539        | 639                         | 2,061      | 4        |
| GEV2396        | 3,504             | 2,927            | 572        | 712                         | 2,213      | 5        |

|         |       |       |     |     |       |   |
|---------|-------|-------|-----|-----|-------|---|
| GEV2397 | 2,872 | 2,399 | 464 | 586 | 1,811 | 5 |
|---------|-------|-------|-----|-----|-------|---|

---

<sup>a</sup> Compared to reference genome Xp91-118.

<sup>b</sup> CDS: coding DNA sequence. Average number of SNPs in CDS and intergenic non-coding regions.

<sup>c</sup> Effect of SNP on coding DNA sequence (CDS) protein product. Non-synonymous: amino acid change; synonymous: no amino acid change; non-sense: early stop codon in CDS.

**Table S4.** Range of genetic distances between seedling (upper panel) and field (left panel) grower A strains in group 2 based on single-nucleotide polymorphisms compared to Xp2010 reference genome.

|                                                              | GEV2050 <sup>a</sup> | GEV2059 | GEV2049 | GEV2048 | GEV2047 | GEV2052 | GEV2060 | GEV2058 | GEV2055 | GEV2063 | Range              |
|--------------------------------------------------------------|----------------------|---------|---------|---------|---------|---------|---------|---------|---------|---------|--------------------|
| <b>GEV2009<sup>b</sup></b>                                   | 0.060                | 0.067   | 0.071   | 0.064   | 0.059   | 0.059   | 0.057   | 0.063   | 0.061   | 0.055   | 0.055-0.071        |
| <b>GEV2011</b>                                               | 0.052                | 0.058   | 0.062   | 0.055   | 0.051   | 0.050   | 0.048   | 0.055   | 0.053   | 0.046   | 0.046-0.062        |
| <b>GEV2013</b>                                               | 0.050                | 0.056   | 0.060   | 0.053   | 0.049   | 0.048   | 0.046   | 0.053   | 0.050   | 0.044   | 0.044-0.060        |
| <b>GEV2004</b>                                               | 0.016                | 0.023   | 0.027   | 0.019   | 0.015   | 0.015   | 0.013   | 0.019   | 0.017   | 0.011   | 0.011-0.027        |
| <b>GEV1992</b>                                               | 0.016                | 0.023   | 0.027   | 0.019   | 0.015   | 0.015   | 0.013   | 0.019   | 0.017   | 0.011   | 0.011-0.027        |
| <b>GEV1989</b>                                               | 0.011                | 0.017   | 0.021   | 0.014   | 0.010   | 0.009   | 0.016   | 0.022   | 0.020   | 0.014   | 0.009-0.022        |
| <b>GEV2015</b>                                               | 0.013                | 0.019   | 0.024   | 0.016   | 0.012   | 0.012   | 0.016   | 0.022   | 0.020   | 0.014   | 0.012-0.024        |
| <b>GEV1993</b>                                               | 0.015                | 0.021   | 0.026   | 0.018   | 0.014   | 0.014   | 0.012   | 0.018   | 0.016   | 0.010   | 0.010-0.026        |
| <b>GEV1991</b>                                               | 0.017                | 0.024   | 0.028   | 0.020   | 0.016   | 0.016   | 0.014   | 0.020   | 0.018   | 0.012   | 0.012-0.028        |
| <b>Overall distance between seedling strains<sup>c</sup></b> |                      |         |         |         |         |         |         |         |         |         | <b>0.005-0.035</b> |

<sup>a</sup> Seedling strains were isolated during 9/2015.

<sup>b</sup> Field strains were isolated during 10/2015.

<sup>c</sup> The pairwise genetic distance between seedling strains only within grower A strains in group 2.

**Table S5.** Assignment of group 2 field strains to grower transplant or reference populations using discriminant analysis of principal components. To assess the influence of potential overfitting, posterior probabilities of assignments were calculated using four and three principal components.

| Field Strain | Source      | Prediction using 4 PCs<br>(posterior probability) | Prediction using 3 PCs<br>(posterior probability) |
|--------------|-------------|---------------------------------------------------|---------------------------------------------------|
| GEV2420      | S. Carolina | Grower B Transplant (1.00)                        | Grower B Transplant (0.989)                       |
| GEV2384      | S. Carolina | Grower B Transplant (1.00)                        | Grower B Transplant (0.989)                       |
| GEV2410      | S. Carolina | Grower B Transplant (1.00)                        | Grower B Transplant (0.998)                       |
| GEV2408      | S. Carolina | Reference (0.77)                                  | Reference (0.969)                                 |
| GEV2407      | S. Carolina | Grower B Transplant (1.00)                        | Grower B Transplant (0.994)                       |
| GEV2403      | S. Carolina | Grower B Transplant (1.00)                        | Grower B Transplant (0.667)                       |
| GEV2400      | S. Carolina | Grower B Transplant (1.00)                        | Grower B Transplant (0.990)                       |
| GEV2399      | S. Carolina | Reference (1.00)                                  | Reference (0.997)                                 |
| GEV2393      | S. Carolina | Grower B Transplant (1.00)                        | Grower B Transplant (0.667)                       |
| GEV2391      | S. Carolina | Grower B Transplant (1.00)                        | Grower B Transplant (0.667)                       |
| GEV2389      | S. Carolina | Grower B Transplant (1.00)                        | Grower B Transplant (0.994)                       |
| GEV2388      | S. Carolina | Reference (1.00)                                  | Reference (0.998)                                 |
| GEV1991      | Grower A    | Grower A Transplant (1.00)                        | Grower A Transplant (1.00)                        |
| GEV1989      | Grower A    | Grower A Transplant (1.00)                        | Grower A Transplant (1.00)                        |
| GEV1992      | Grower A    | Grower A Transplant (1.00)                        | Grower A Transplant (1.00)                        |
| GEV2004      | Grower A    | Grower A Transplant (1.00)                        | Grower A Transplant (1.00)                        |
| GEV1993      | Grower A    | Grower A Transplant (1.00)                        | Grower A Transplant (1.00)                        |



---

|         |          |                            |                             |
|---------|----------|----------------------------|-----------------------------|
| GEV2009 | Grower A | Grower B Transplant (1.00) | Grower B Transplant (0.771) |
| GEV2011 | Grower A | Grower B Transplant (1.00) | Grower B Transplant (0.770) |
| GEV2013 | Grower A | Grower B Transplant (1.00) | Grower B Transplant (0.779) |
| GEV2015 | Grower A | Grower A Transplant (1.00) | Grower A Transplant (1.00)  |
| GEV2109 | Grower B | Grower B Transplant (1.00) | Grower B Transplant (0.998) |
| GEV2110 | Grower B | Reference (1.00)           | Reference (0.999)           |
| GEV2111 | Grower B | Reference (1.00)           | Reference (0.999)           |
| GEV2113 | Grower B | Grower B Transplant (1.00) | Grower B Transplant (0.784) |
| GEV2114 | Grower B | Grower B Transplant (1.00) | Grower B Transplant (0.894) |
| GEV2129 | Grower B | Grower B Transplant (1.00) | Grower B Transplant (0.997) |
| GEV2132 | Grower B | Reference (1.00)           | Reference (0.999)           |
| GEV2133 | Grower B | Grower B Transplant (1.00) | Grower B Transplant (0.682) |
| GEV2135 | Grower B | Reference (1.00)           | Reference (0.999)           |
| GEV2115 | Grower B | Grower B Transplant (1.00) | Grower B Transplant (0.997) |
| GEV2116 | Grower B | Grower B Transplant (1.00) | Grower B Transplant (0.997) |
| GEV2117 | Grower B | Reference (1.00)           | Reference (0.999)           |
| GEV2118 | Grower B | Grower B Transplant (1.00) | Grower B Transplant (0.998) |
| GEV2119 | Grower B | Grower B Transplant (1.00) | Grower B Transplant (0.661) |
| GEV2120 | Grower B | Grower B Transplant (1.00) | Grower B Transplant (0.873) |
| GEV2126 | Grower B | Reference (1.00)           | Reference (0.999)           |
| GEV2123 | Grower B | Grower B Transplant (1.00) | Grower B Transplant (0.998) |

---

**Table S6.** Range of genetic distances between seedling (upper panel) and field (left panel) grower B strains in group 2 based on single-nucleotide polymorphisms compared to Xp2010 reference genome.

|                       | GEV 1911 | GEV 1918 | GEV 1917 | GEV 2072 <sup>a</sup> | GEV 1919 | GEV 1921 | GEV 1913 | GEV 2089 <sup>a</sup> | GEV 1912 | GEV 1916 | GEV 1915 | GEV 2067 <sup>a</sup> | GEV 1914 | GEV 1920 | GEV 2088 <sup>a</sup> | GEV 2098 <sup>a</sup> | GEV 2087 <sup>a</sup> | Range          |
|-----------------------|----------|----------|----------|-----------------------|----------|----------|----------|-----------------------|----------|----------|----------|-----------------------|----------|----------|-----------------------|-----------------------|-----------------------|----------------|
| GEV 2133 <sup>b</sup> | 0.628    | 0.629    | 0.626    | 0.625                 | 0.631    | 0.628    | 0.628    | 0.631                 | 0.627    | 0.629    | 0.035    | 0.038                 | 0.038    | 0.043    | 0.043                 | 0.049                 | 0.046                 | 0.035<br>0.631 |
| GEV 2113              | 0.612    | 0.613    | 0.61     | 0.609                 | 0.615    | 0.612    | 0.612    | 0.615                 | 0.611    | 0.613    | 0.019    | 0.022                 | 0.022    | 0.027    | 0.033                 | 0.039                 | 0.036                 | 0.019<br>0.615 |
| GEV 2384              | 0.162    | 0.163    | 0.16     | 0.159                 | 0.165    | 0.162    | 0.162    | 0.165                 | 0.161    | 0.163    | 0.447    | 0.45                  | 0.45     | 0.455    | 0.461                 | 0.468                 | 0.464                 | 0.159<br>0.468 |
| GEV 2420              | 0.168    | 0.169    | 0.166    | 0.165                 | 0.171    | 0.168    | 0.168    | 0.171                 | 0.167    | 0.169    | 0.597    | 0.6                   | 0.6      | 0.604    | 0.611                 | 0.617                 | 0.614                 | 0.165<br>0.617 |
| GEV 2407              | 0.087    | 0.088    | 0.085    | 0.084                 | 0.091    | 0.087    | 0.087    | 0.091                 | 0.086    | 0.088    | 0.619    | 0.622                 | 0.622    | 0.626    | 0.633                 | 0.639                 | 0.636                 | 0.084<br>0.639 |
| GEV 2389              | 0.085    | 0.086    | 0.083    | 0.082                 | 0.088    | 0.085    | 0.085    | 0.088                 | 0.084    | 0.086    | 0.653    | 0.656                 | 0.656    | 0.661    | 0.667                 | 0.674                 | 0.67                  | 0.082<br>0.674 |
| GEV 2123              | 0.015    | 0.008    | 0.005    | 0.004                 | 0.011    | 0.007    | 0.007    | 0.011                 | 0.006    | 0.008    | 0.608    | 0.612                 | 0.612    | 0.616    | 0.622                 | 0.629                 | 0.626                 | 0.004<br>0.629 |
| GEV 2410              | 0.016    | 0.01     | 0.006    | 0.005                 | 0.01     | 0.006    | 0.006    | 0.01                  | 0.005    | 0.007    | 0.61     | 0.613                 | 0.613    | 0.617    | 0.623                 | 0.63                  | 0.627                 | 0.005<br>0.63  |
| GEV 2116              | 0.035    | 0.029    | 0.026    | 0.025                 | 0.027    | 0.023    | 0.021    | 0.029                 | 0.025    | 0.027    | 0.629    | 0.632                 | 0.632    | 0.636    | 0.643                 | 0.649                 | 0.646                 | 0.021<br>0.649 |
| GEV 2115              | 0.036    | 0.03     | 0.027    | 0.026                 | 0.028    | 0.025    | 0.023    | 0.03                  | 0.026    | 0.028    | 0.63     | 0.633                 | 0.633    | 0.637    | 0.644                 | 0.65                  | 0.647                 | 0.023<br>0.65  |
| GEV 2109              | 0.019    | 0.013    | 0.01     | 0.008                 | 0.013    | 0.01     | 0.01     | 0.013                 | 0.008    | 0.011    | 0.613    | 0.616                 | 0.616    | 0.62     | 0.627                 | 0.633                 | 0.63                  | 0.008<br>0.633 |
| GEV 2129              | 0.016    | 0.01     | 0.006    | 0.005                 | 0.01     | 0.006    | 0.006    | 0.01                  | 0.005    | 0.007    | 0.609    | 0.613                 | 0.613    | 0.617    | 0.623                 | 0.63                  | 0.627                 | 0.005<br>0.63  |
| GEV 2118              | 0.02     | 0.014    | 0.011    | 0.01                  | 0.014    | 0.011    | 0.011    | 0.014                 | 0.01     | 0.012    | 0.614    | 0.617                 | 0.617    | 0.621    | 0.628                 | 0.634                 | 0.631                 | 0.01<br>0.634  |
| GEV 2400              | 0.127    | 0.128    | 0.124    | 0.123                 | 0.13     | 0.127    | 0.127    | 0.13                  | 0.125    | 0.128    | 0.611    | 0.614                 | 0.614    | 0.618    | 0.624                 | 0.631                 | 0.628                 | 0.123<br>0.631 |
| GEV 2120              | 0.61     | 0.611    | 0.607    | 0.606                 | 0.613    | 0.61     | 0.61     | 0.613                 | 0.608    | 0.611    | 0.004    | 0.007                 | 0.007    | 0.012    | 0.031                 | 0.037                 | 0.034                 | 0.004<br>0.613 |
| GEV 2114              | 0.612    | 0.613    | 0.609    | 0.608                 | 0.615    | 0.612    | 0.612    | 0.615                 | 0.611    | 0.613    | 0.002    | 0.005                 | 0.003    | 0.01     | 0.033                 | 0.039                 | 0.036                 | 0.002<br>0.615 |
| GEV 2408              | 0.667    | 0.668    | 0.665    | 0.664                 | 0.67     | 0.667    | 0.667    | 0.67                  | 0.666    | 0.668    | 0.074    | 0.077                 | 0.077    | 0.082    | 0.082                 | 0.088                 | 0.085                 | 0.074<br>0.67  |
| GEV 2126              | 0.705    | 0.706    | 0.703    | 0.702                 | 0.708    | 0.705    | 0.705    | 0.708                 | 0.704    | 0.706    | 0.113    | 0.116                 | 0.116    | 0.12     | 0.12                  | 0.126                 | 0.123                 | 0.113<br>0.708 |

|                                                              |       |       |       |       |       |       |       |       |       |       |       |       |       |       |       |       |       |                         |
|--------------------------------------------------------------|-------|-------|-------|-------|-------|-------|-------|-------|-------|-------|-------|-------|-------|-------|-------|-------|-------|-------------------------|
| <b>GEV 2132</b>                                              | 0.704 | 0.705 | 0.702 | 0.701 | 0.707 | 0.704 | 0.704 | 0.707 | 0.703 | 0.705 | 0.111 | 0.115 | 0.115 | 0.119 | 0.119 | 0.125 | 0.122 | 0.111<br>0.707          |
| <b>GEV 2111</b>                                              | 0.714 | 0.715 | 0.712 | 0.71  | 0.717 | 0.714 | 0.714 | 0.717 | 0.713 | 0.715 | 0.121 | 0.124 | 0.124 | 0.129 | 0.129 | 0.135 | 0.132 | 0.121<br>0.717          |
| <b>GEV 2110</b>                                              | 0.731 | 0.732 | 0.729 | 0.728 | 0.735 | 0.731 | 0.731 | 0.735 | 0.73  | 0.732 | 0.139 | 0.142 | 0.142 | 0.146 | 0.146 | 0.153 | 0.149 | 0.139<br>0.735          |
| <b>GEV 2399</b>                                              | 0.746 | 0.747 | 0.744 | 0.743 | 0.749 | 0.746 | 0.746 | 0.749 | 0.745 | 0.747 | 0.154 | 0.157 | 0.157 | 0.161 | 0.161 | 0.167 | 0.164 | 0.154<br>0.749          |
| <b>GEV 2388</b>                                              | 0.744 | 0.745 | 0.741 | 0.74  | 0.747 | 0.744 | 0.744 | 0.747 | 0.742 | 0.745 | 0.151 | 0.154 | 0.154 | 0.158 | 0.159 | 0.165 | 0.162 | 0.151<br>0.747          |
| <b>GEV 2135</b>                                              | 0.727 | 0.728 | 0.725 | 0.724 | 0.73  | 0.727 | 0.727 | 0.73  | 0.726 | 0.728 | 0.134 | 0.138 | 0.138 | 0.142 | 0.142 | 0.148 | 0.145 | 0.134<br>0.73           |
| <b>GEV 2117</b>                                              | 0.727 | 0.728 | 0.725 | 0.724 | 0.73  | 0.727 | 0.727 | 0.73  | 0.726 | 0.728 | 0.134 | 0.138 | 0.138 | 0.142 | 0.142 | 0.148 | 0.145 | 0.134<br>0.73           |
| <b>GEV 2403</b>                                              | 0.621 | 0.622 | 0.619 | 0.618 | 0.624 | 0.621 | 0.621 | 0.624 | 0.62  | 0.622 | 0.029 | 0.032 | 0.032 | 0.036 | 0.036 | 0.043 | 0.039 | 0.029<br>0.624          |
| <b>GEV 2393</b>                                              | 0.619 | 0.62  | 0.617 | 0.616 | 0.622 | 0.619 | 0.619 | 0.622 | 0.618 | 0.62  | 0.027 | 0.03  | 0.03  | 0.034 | 0.034 | 0.04  | 0.037 | 0.027<br>0.622          |
| <b>GEV 2391</b>                                              | 0.624 | 0.626 | 0.622 | 0.621 | 0.628 | 0.624 | 0.624 | 0.628 | 0.623 | 0.626 | 0.032 | 0.035 | 0.035 | 0.039 | 0.039 | 0.046 | 0.043 | 0.032<br>0.628          |
| <b>GEV 2119</b>                                              | 0.616 | 0.617 | 0.614 | 0.613 | 0.619 | 0.616 | 0.616 | 0.619 | 0.615 | 0.617 | 0.023 | 0.027 | 0.027 | 0.031 | 0.031 | 0.037 | 0.034 | 0.023-<br>0.619         |
| <b>Overall distance between seedling strains<sup>b</sup></b> |       |       |       |       |       |       |       |       |       |       |       |       |       |       |       |       |       | <b>0.003-<br/>0.633</b> |

<sup>a</sup> Seedling strains were isolated at the same time as field strains during 3/2016.

<sup>b</sup> Field strains were isolated during 3/2016.

<sup>c</sup> The pairwise genetic distance between transplant seedling strains collected during 12/2015 and 3/2016 from grower B in group 2.

**Table S7.** Range of genetic distances between seedling (upper panel) and field (left panel) of grower B strains in group 3 based on single-nucleotide polymorphisms compared to Xp17-12 reference genome.

|                                                              | <b>GEV2099<sup>a</sup></b> | <b>GEV2065<sup>a</sup></b> | <b>GEV2097<sup>a</sup></b> | <b>Range</b>       |
|--------------------------------------------------------------|----------------------------|----------------------------|----------------------------|--------------------|
| <b>GEV2108</b>                                               | 0.063                      | 0.645                      | 0.170                      | 0.063-0.645        |
| <b>GEV2121</b>                                               | 0.173                      | 0.541                      | 0.066                      | 0.066-0.541        |
| <b>GEV2010<sup>c</sup></b>                                   | 0.194                      | 0.562                      | 0.086                      | 0.086-0.562        |
| <b>GEV2390</b>                                               | 0.183                      | 0.551                      | 0.076                      | 0.076-0.551        |
| <b>GEV2392</b>                                               | 0.225                      | 0.593                      | 0.117                      | 0.117-0.593        |
| <b>GEV2397</b>                                               | 0.262                      | 0.629                      | 0.154                      | 0.154-0.629        |
| <b>GEV2396</b>                                               | 0.251                      | 0.619                      | 0.144                      | 0.144-0.619        |
| <b>GEV2134</b>                                               | 0.600                      | 0.109                      | 0.493                      | 0.109-0.600        |
| <b>GEV2128</b>                                               | 0.738                      | 0.117                      | 0.631                      | 0.117-0.738        |
| <b>GEV2112</b>                                               | 0.650                      | 0.053                      | 0.543                      | 0.053-0.650        |
| <b>GEV2122</b>                                               | 0.646                      | 0.053                      | 0.539                      | 0.053-0.646        |
| <b>GEV2127</b>                                               | 0.114                      | 0.696                      | 0.221                      | 0.114-0.696        |
| <b>GEV2124</b>                                               | 0.069                      | 0.651                      | 0.176                      | 0.069-0.651        |
| <b>GEV2125</b>                                               | 0.099                      | 0.681                      | 0.206                      | 0.099-0.681        |
| <b>GEV2130</b>                                               | 0.053                      | 0.636                      | 0.16                       | 0.053-0.636        |
| <b>Overall distance between seedling strains<sup>d</sup></b> |                            |                            |                            | <b>0.156-0.632</b> |

<sup>a</sup> Seedling strains were isolated at the same time as field strains during 3/2016.

<sup>b</sup> Field strains were isolated during 3/2016.

<sup>c</sup> GEV2010 is the only grower A strain in group 3.

<sup>d</sup> The pairwise genetic distance between transplant seedling strains in group 3 only.

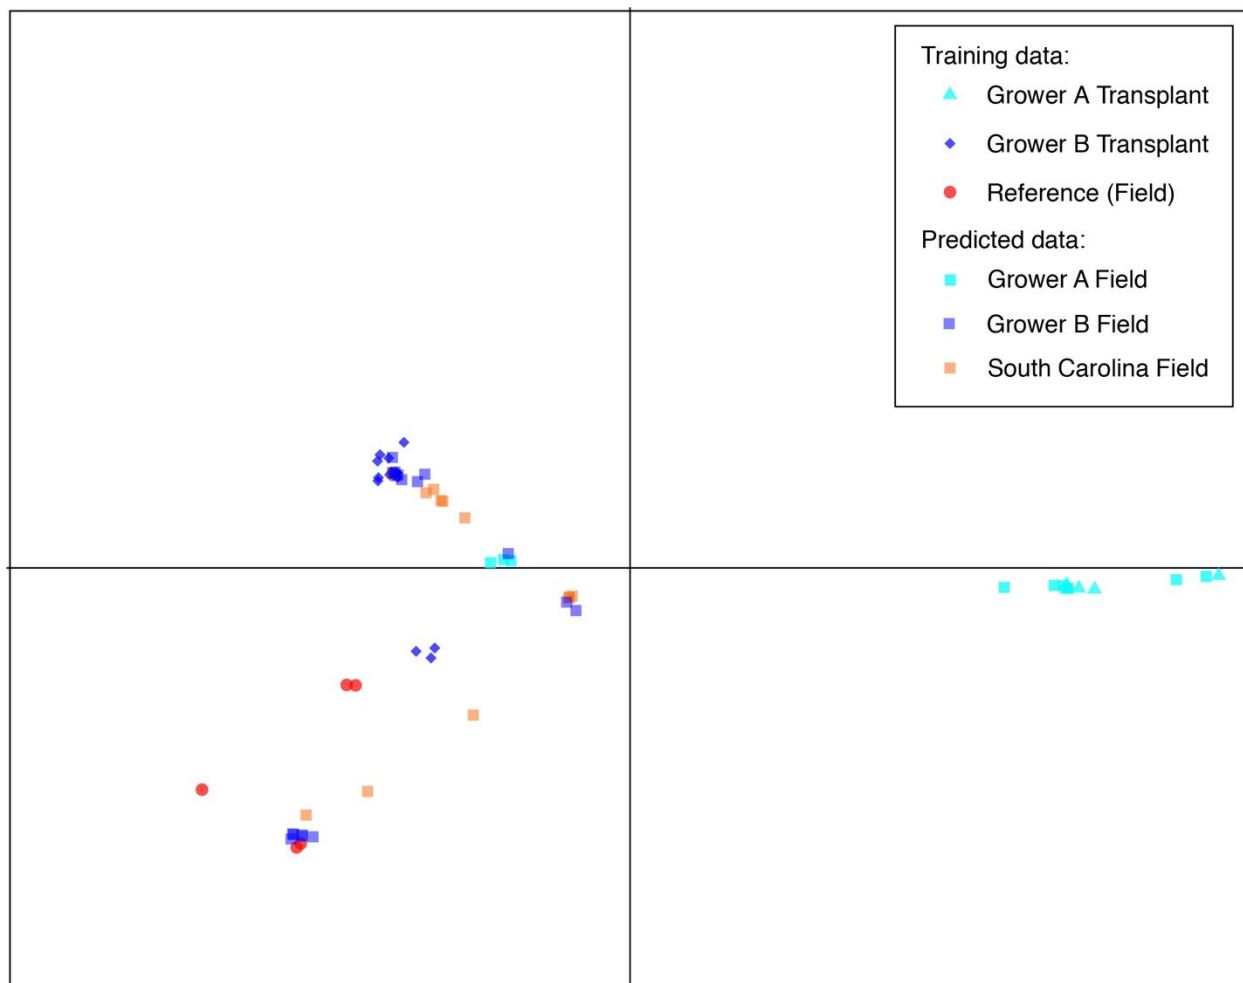

**Figure S1.** Discriminant analysis of principal components analysis of group 2 SNP data. Three populations were defined as training data: Grower A transplant, Grower B transplant and Reference, which composed of field strains from previous collections. Field strains were mapped on the discriminant functions (Predicted data). This analysis used four principal components and two discriminant functions.
